# Supplementary material
Source: MDPI journal article supplement (https://www.mdpi.com/2313-0105/9/7/363)
Supplement: s1 [file s1]

## Supporting Information

# Two-Dimensional Molecular Brush-Based Ultrahigh Edge-Nitrogen-Doped Carbon Nanosheets for Ultrafast Potassium-Ion Storage

Zongheng Cen, Youchen Tang, Junlong Huang, Yongqi Chen, Haozhen Yang, Dongtian Miao, Dingcai Wu \* and Shaohong Liu \*

PCFM Lab, School of Chemistry, Sun Yat-sen University, Guangzhou 510006, China

\* Correspondence: wudc@mail.sysu.edu.cn (D.W.); liushh27@mail.sysu.edu.cn (S.L.)

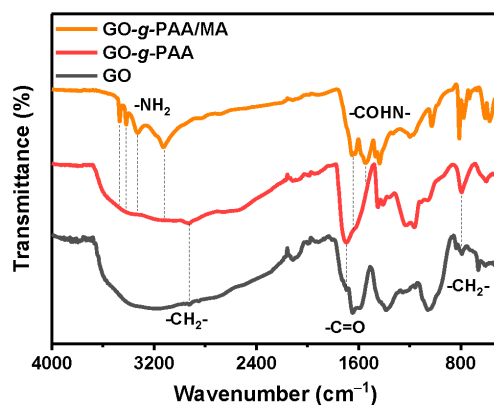

Figure S1. FT-IR spectra of GO, GO-g-PAA and GO-g-PAA/MA.

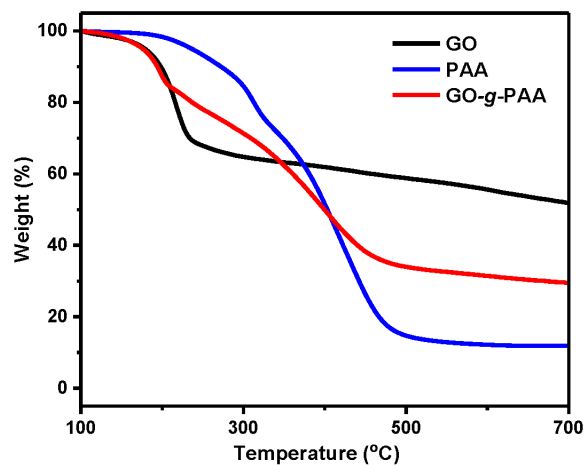

Figure S2. TGA curves of GO, PAA and GO-g-PAA.

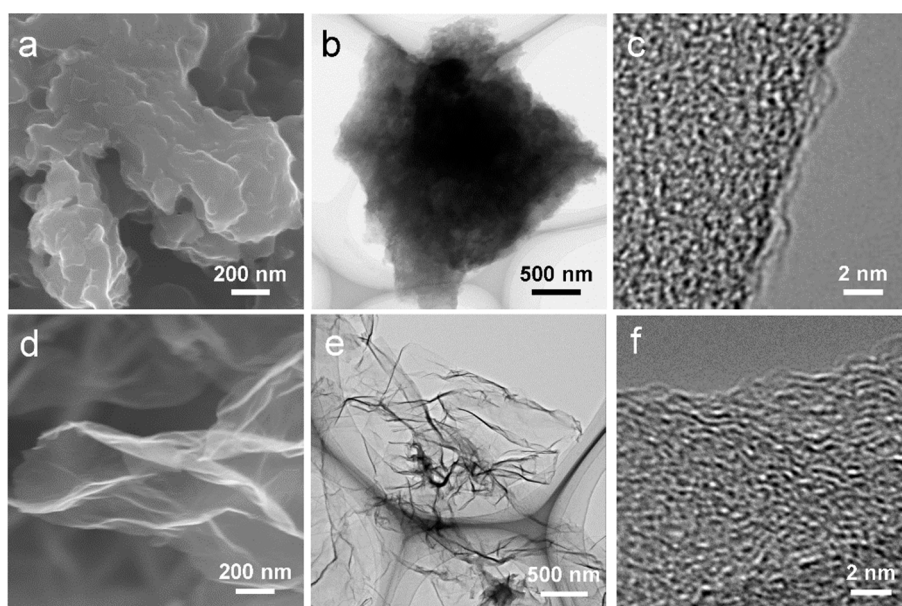

**Figure S3.** SEM, TEM and HRTEM images of (a-c) ENCNP and (d-f) CNS.

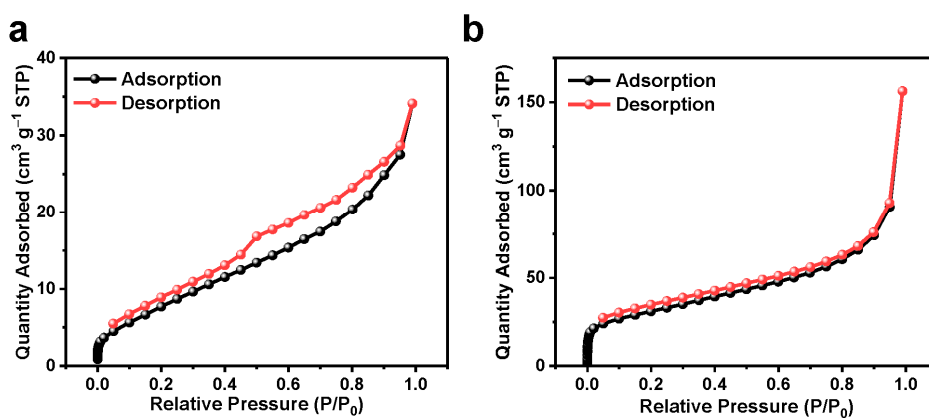

**Figure S4.** N<sub>2</sub> adsorption-desorption isotherms of (a) ENCNP and (b) CNS.

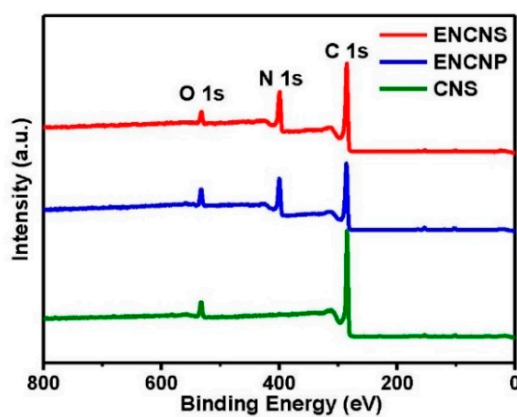

**Figure S5.** XPS full scans of ENCNS, ENCNP and CNS, revealing the presence of C, N and O elements.

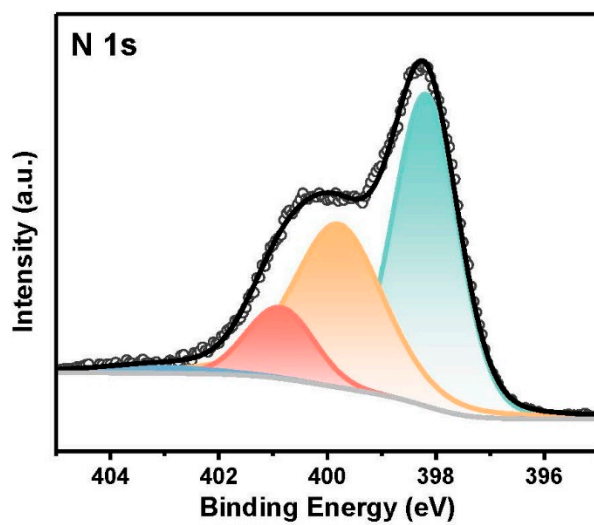

**Figure S6.** High-resolution N 1s XPS spectrum of ENCNP.

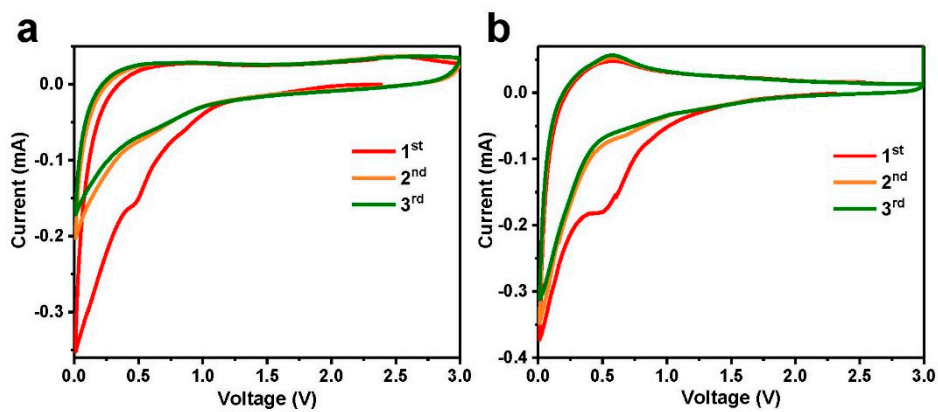

**Figure S7.** CV curves of (a) ENCNP and (b) CNS anodes at a scan rate of  $0.2 \text{ mV s}^{-1}$ .

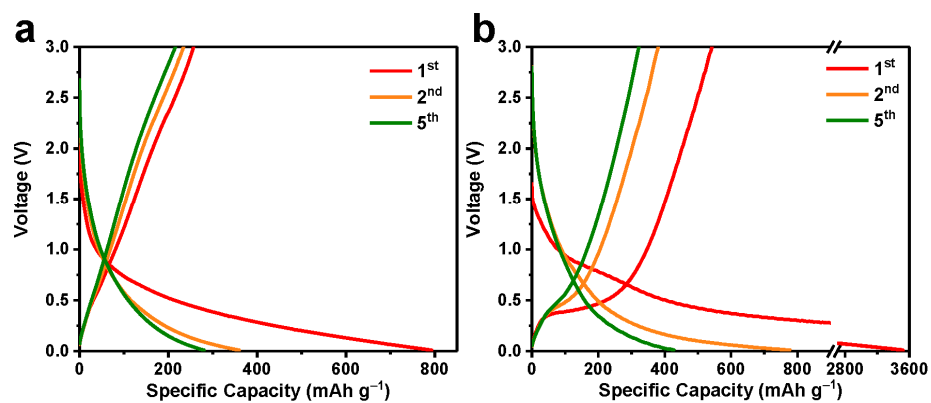

**Figure S8.** Discharge/charge curves of (a) ENCNP and (b) CNS anodes at a current density of  $0.05 \text{ A g}^{-1}$ .

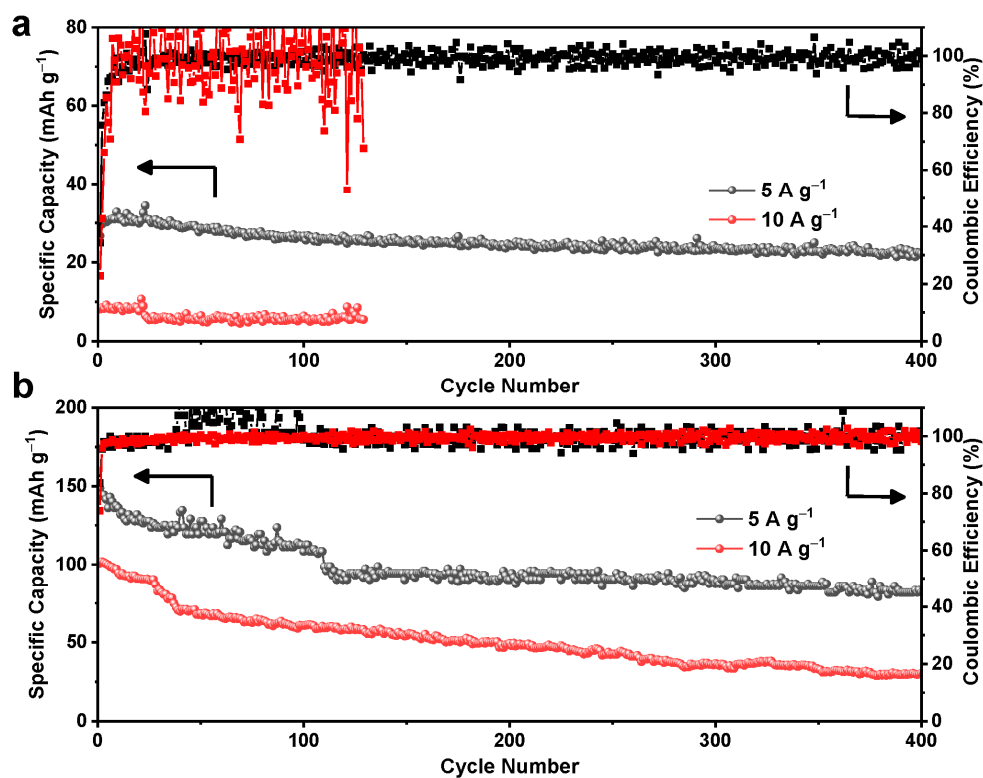

**Figure S9.** Long-term cycling performances of (a) ENCNP and (b) CNS at 5 and 10 A g<sup>-1</sup>.

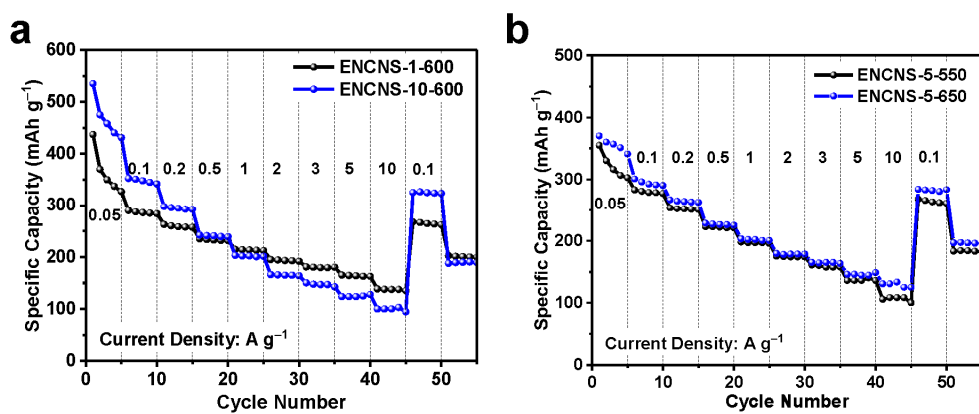

**Figure S10.** Rate capability of (a) ENCNS-1-600 and ENCNS-10-600 as well as (b) ENCNS-5-550 and ENCNS-5-650 at various current densities between 0.05 and 10.0 A g<sup>-1</sup>.

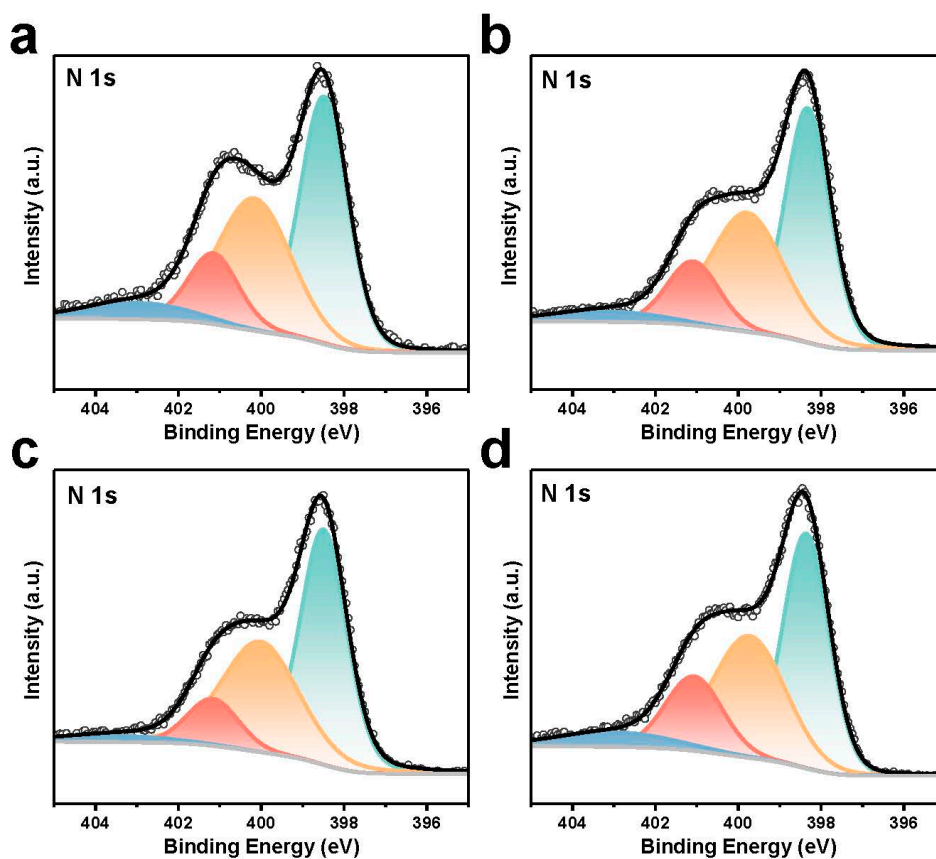

**Figure S11.** High-resolution N 1s XPS spectra of (a) ENCNS-1-600, (b) ENCNS-10-600, (c) ENCNS-5-550, and (d) ENCNS-5-650.

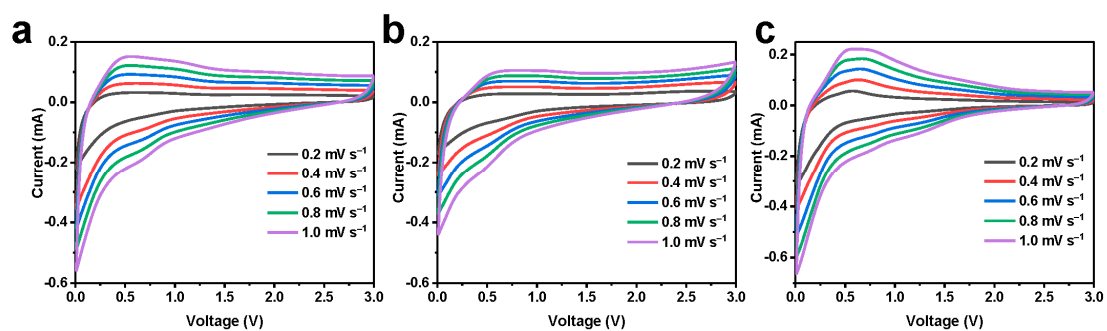

**Figure S12.** CV curves of (a) ENCNS, (b) ENCNP, and (c) CNS at scan rates of 0.2, 0.4, 0.6, 0.8 and 1.0  $\text{mV s}^{-1}$ .

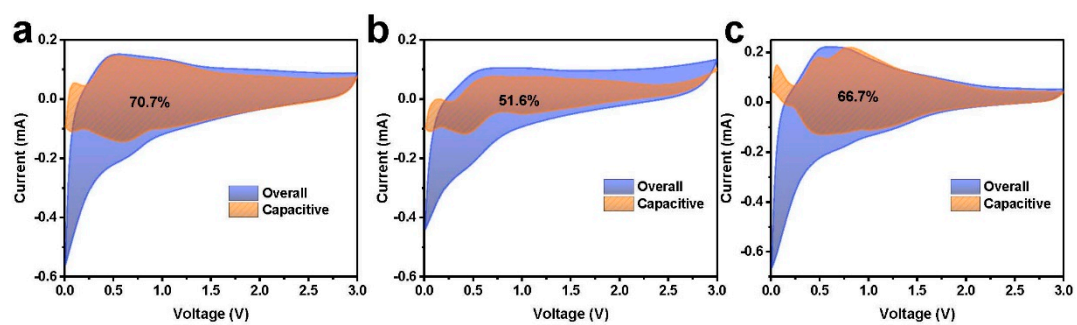

**Figure S13.** Capacitive contributions of (a) ENCNS, (b) ENCNP, and (c) CNS at a scan rate of 1.0 mV s<sup>-1</sup>.

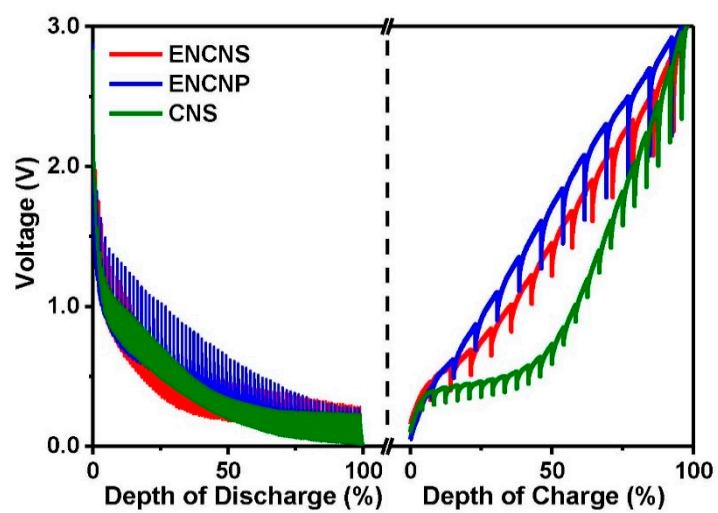

**Figure S14.** GITT potential profiles of ENCNS, ENCNP, and CNS.

**Table S1.** Total nitrogen and edge-nitrogen contents of various samples obtained with different molar ratios of -NH<sub>2</sub>/-COOH and heat treatment temperatures.

| <b>Sample</b>       | <b>Total<br/>nitrogen<br/>content<br/>(at%)</b> | <b>N6 content<br/>(at%)</b> | <b>N5 content<br/>(at%)</b> | <b>NQ content<br/>(at%)</b> | <b>NO content<br/>(at%)</b> | <b>Edge-<br/>nitrogen<br/>content<br/>(at%)</b> |
|---------------------|-------------------------------------------------|-----------------------------|-----------------------------|-----------------------------|-----------------------------|-------------------------------------------------|
| <b>ENCNS</b>        | 20.6                                            | 8.5                         | 7.7                         | 2.8                         | 1.6                         | 16.2                                            |
| <b>CNS</b>          | 0.6                                             | -                           | -                           | -                           | -                           | -                                               |
| <b>ENCNP</b>        | 22.4                                            | 10.9                        | 8.7                         | 2.4                         | 0.4                         | 19.6                                            |
| <b>ENCNS-5-550</b>  | 24.1                                            | 11.6                        | 9.3                         | 2.5                         | 0.7                         | 20.9                                            |
| <b>ENCNS-5-650</b>  | 19.3                                            | 8.1                         | 6.7                         | 3.2                         | 1.3                         | 14.8                                            |
| <b>ENCNS-1-600</b>  | 9.3                                             | 4.1                         | 3.4                         | 1.3                         | 0.5                         | 7.5                                             |
| <b>ENCNS-10-600</b> | 21.6                                            | 9.4                         | 8.3                         | 3.0                         | 0.9                         | 17.7                                            |

**Table S2.** Total nitrogen content, edge-nitrogen content, and reversible capacity at 5 A g<sup>-1</sup> of ENCNS and other reported nitrogen-doped carbonaceous anode materials in PIBs.

| Sample     | Total nitrogen<br>content (at%) | Edge-nitrogen<br>content (at%) | Reversible capacity<br>at 5 A g <sup>-1</sup> (mAh g <sup>-1</sup> ) | Reference        |
|------------|---------------------------------|--------------------------------|----------------------------------------------------------------------|------------------|
| ENCNS      | 20.6                            | 16.2                           | 168                                                                  | <b>This work</b> |
| HNC        | 17.03                           | 15.70                          | 93.0                                                                 | [1]              |
| N-CNFs     | 13.1                            | 7.2                            | 144                                                                  | [2]              |
| NPPC-2-700 | 3.68                            | 2.82                           | 133                                                                  | [3]              |
| MCS-7-900  | 5.27                            | 1.96                           | 107.9                                                                | [4]              |
| NCSN       | 8.10                            | 5.91                           | 149                                                                  | [5]              |
| ENDC       | 10.5                            | 9.2                            | 74                                                                   | [6]              |
| NSC        | 2.09                            | 1.57                           | 115                                                                  | [7]              |
| HENC       | 5.78                            | 4.38                           | 101                                                                  | [8]              |
| NCTP       | 11.7                            | 9.0                            | 134.7                                                                | [9]              |
| HOCNs      | 16.54                           | 12.58                          | 136                                                                  | [10]             |
| N-PCNS     | 12.1                            | 11.8                           | 127.5                                                                | [11]             |
| 3DNFC      | 5.74                            | 5.02                           | 115                                                                  | [12]             |
| NCNFs      | 13.8                            | 7.7                            | 126                                                                  | [13]             |



## Reference

1. Huang, R.; Cao, Y. P.; Qin, S. Y.; Ren, Y. X.; Lan, R. C.; Zhang, L. Y.; Yu, Z.; Yang, H. Ultra-high N-doped open hollow carbon nano-cage with excellent Na<sup>+</sup> and K<sup>+</sup> storage performances. *Mater Today Nano*, **2022**, *18*, 100217.
2. Gong, J.; Zhao, G. Q.; Feng, J. K.; Wang, G. L.; Shi, Z. L.; An, Y. L.; Zhang, L.; Li, B. Control of the structure and composition of nitrogen-doped carbon nanofoams derived from CO<sub>2</sub> foamed polyacrylonitrile as anodes for high-performance potassium-ion batteries. *Electrochim Acta*, **2021**, *388*, 138630.
3. Ma, X. Q.; Xiao, N.; Xiao, J.; Song, X. D.; Guo, H. D.; Wang, Y. T.; Zhao, S. J.; Zhong, Y. P.; Qiu, J. S. Nitrogen and phosphorus dual-doped porous carbons for high-rate potassium ion batteries. *Carbon*, **2021**, *179*, 33-41.
4. Zheng, J. F.; Wu, Y. J.; Tong, Y.; Liu, X.; Sun, Y. J.; Li, H. Y.; Niu, L. High capacity and fast kinetics of potassium-ion batteries boosted by nitrogen-doped mesoporous carbon spheres. *Nano-Micro Lett*, **2021**, *13*, 174.
5. Bi, H. H.; He, X. J.; Yang, L.; Li, H. Q.; Jin, B. Y.; Qiu, J. S. Interconnected carbon nanocapsules with high N/S co-doping as stable and high-capacity potassium-ion battery anode. *J Energy Chem*, **2022**, *66*, 195-204.
6. Zhang, W. L.; Cao, Z.; Wang, W. X.; Alhajji, E.; Emwas, A.-H.; Costa, P. M. F. J.; Cavallo L.; Alshareef, H. N. A site-selective doping strategy of carbon anodes with remarkable K-ion storage capacity. *Angew Chem Int Ed*, **2020**, *59*, 4448-4455.
7. Liu, Q. D.; Han, F.; Zhou, J. F.; Li, Y.; Chen, L.; Zhang, F. Q.; Zhou, D. W.; Ye, C.; Yang, J. X.; Wu, X.; Liu, J. S. Boosting the potassium-ion storage performance in soft carbon anodes by the synergistic effect of optimized molten salt medium and N/S dual-doping. *ACS Appl Mater Inter*, **2020**, *12*, 20838-20848.
8. Zhao, Y.; Sun, Z. T.; Yi, Y. Y.; Lu, C.; Wang, M. L.; Xia, Z.; Lian, X. Y.; Liu, Z. F.; Sun, J. Y. Precise synthesis of N-doped graphitic carbon via chemical vapor deposition to unravel the dopant functions on potassium storage toward practical K-ion batteries. *Nano Res*, **2021**, *14*, 1413-1420.
9. Wang, K.; Li, N. N.; Sun, L.; Zhang, J.; Liu, X. H. Free-standing N-doped carbon nanotube films with tunable defects as a high capacity anode for potassium-ion batteries. *ACS Appl Mater Inter*, **2020**, *12*, 37506-37514.
10. Liu, S. T.; Yang, B. B.; Zhou, J. S.; Song, H. H. Nitrogen-rich carbon-onion-constructed nanosheets: An ultrafast and ultrastable dual anode material for sodium and potassium storage. *J Mater Chem A*, **2019**, *7*, 18499-18509.
11. Zhang, D. M.; Chen, Z. W.; Bai, J.; Yang, C. C.; Jiang, Q. Highly nitrogen-doped porous carbon nanosheets as high-performance anode for potassium-ion batteries. *Batteries Supercaps*, **2020**, *3*, 185-193.
12. Yang, B. J.; Chen, J. T.; Liu, L. Y.; Ma, P. J.; Liu, B.; Lang, J. W.; Tang, Y.; Yan, X. B. 3D nitrogen-doped framework carbon for high-performance potassium ion hybrid capacitor. *Energy Storage Mater*, **2019**, *23*, 522-529.
13. Xu, Y.; Zhang, C. L.; Zhou, M.; Fu, Q.; Zhao, C. X.; Wu, M. H.; Lei, Y. Highly nitrogen doped carbon nanofibers with superior rate capability and cyclability for potassium ion batteries. *Nat Commun*, **2018**, *9*, 1720.
